# Supplementary material for: Classification of flood-generating processes in Africa
Source: PubMed Central journal article supplement (PMC9640565; doi:10.1038/s41598-022-23725-5), 2022-11-07
Supplement: 41598_2022_23725_MOESM1_ESM.pdf [file 41598_2022_23725_MOESM1_ESM.pdf]

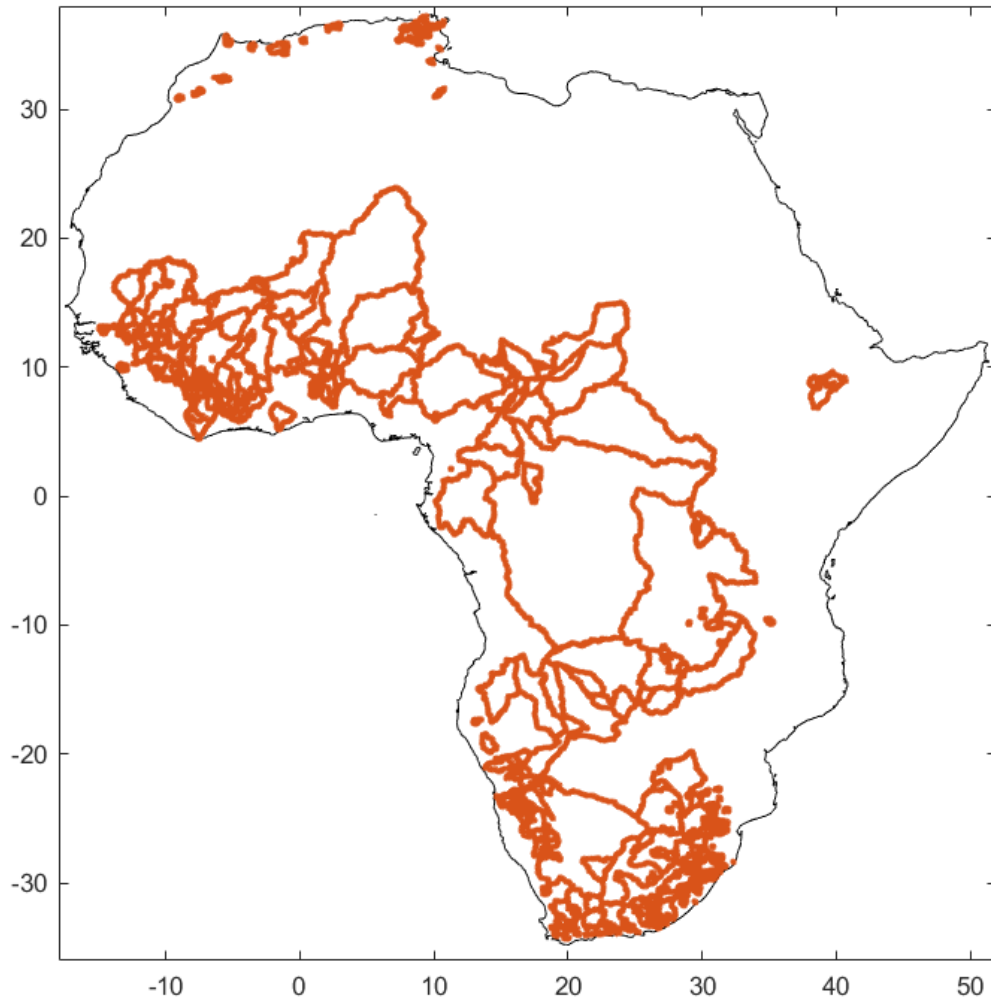

Figure S1: Catchment areas corresponding to the selected stations. The catchment delimitation has been performed with the digital elevation model from the Hydrosheds database (<https://www.hydrosheds.org/>).

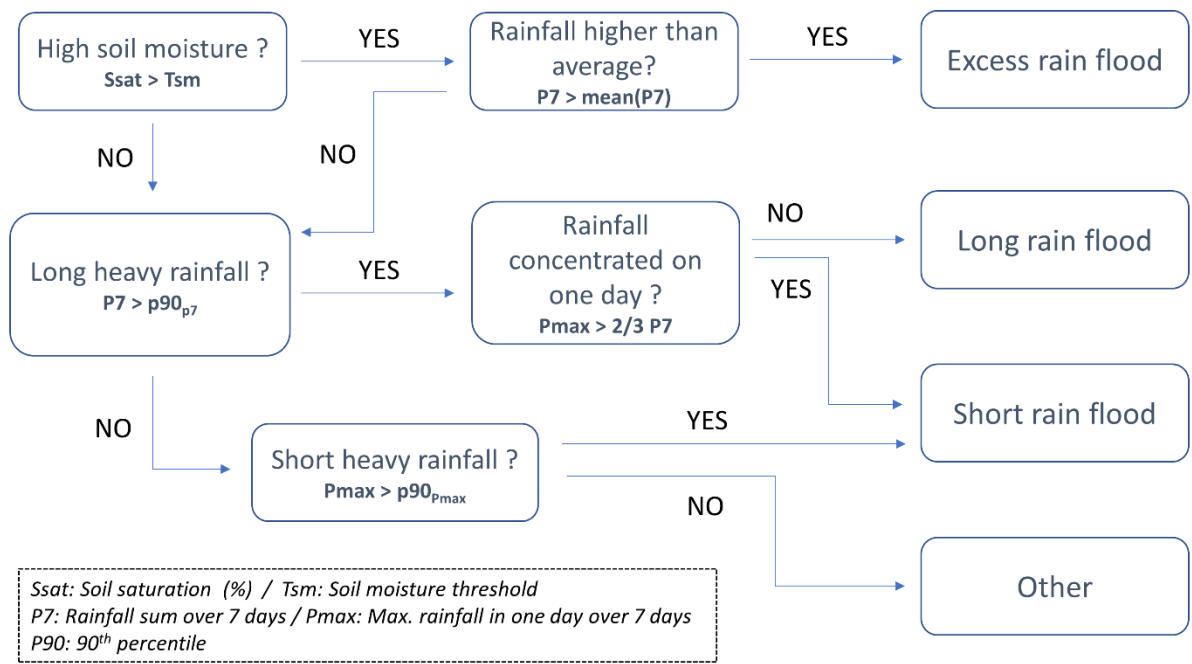

Figure S2: Decision tree for flood classification, modified from Stein et al. 2020
